# Supplementary material
Source: PubMed Central journal article supplement (PMC7073463)
Supplement: EMBJ-39-e103412-s001.pdf [file EMBJ-39-e103412-s001.pdf]

Appendix for

**Structural and functional insights into a novel signaling network regulating biofilm formation**

Gukui Chen<sup>1, #</sup>, Jianhua Gan<sup>2, #</sup>, Chun Yang<sup>2</sup>, Yili Zuo<sup>1</sup>, Juan Peng<sup>1</sup>, Meng Li<sup>1</sup>, Weiping Huo<sup>1</sup>, Yingpeng Xie<sup>3</sup>, Yani Zhang<sup>1</sup>, Tietao Wang<sup>1</sup>, Xin Deng<sup>3</sup> and Haihua Liang<sup>1,\*</sup>

<sup>1</sup> Key Laboratory of Resources Biology and Biotechnology in Western China, Ministry of Education, College of Life Sciences, Northwest University, Xi'an, ShaanXi, 710069, China

<sup>2</sup> Shanghai Public Health Clinical Center, State Key Laboratory of Genetic Engineering, Collaborative Innovation Center of Genetics and Development, School of Life Sciences, Fudan University, Shanghai 200438, China

<sup>3</sup> Department of Biomedical Sciences, City University of Hong Kong, Hong Kong, People's Republic of China.

# These authors contributed equally to this work

\*To whom correspondence should be addressed:

Dr. Haihua Liang

College of Life Science, Northwest University, No 229 Taibai Rd, Xi'an, ShaanXi 710069, China; Phone: (86) 29-88303662. Email: [lianghh@nwu.edu.cn](mailto:lianghh@nwu.edu.cn)

## **Table of Contents**

Appendix Figures S1 to S10

Appendix Tables S1 to S3

Appendix References

## Appendix Figures

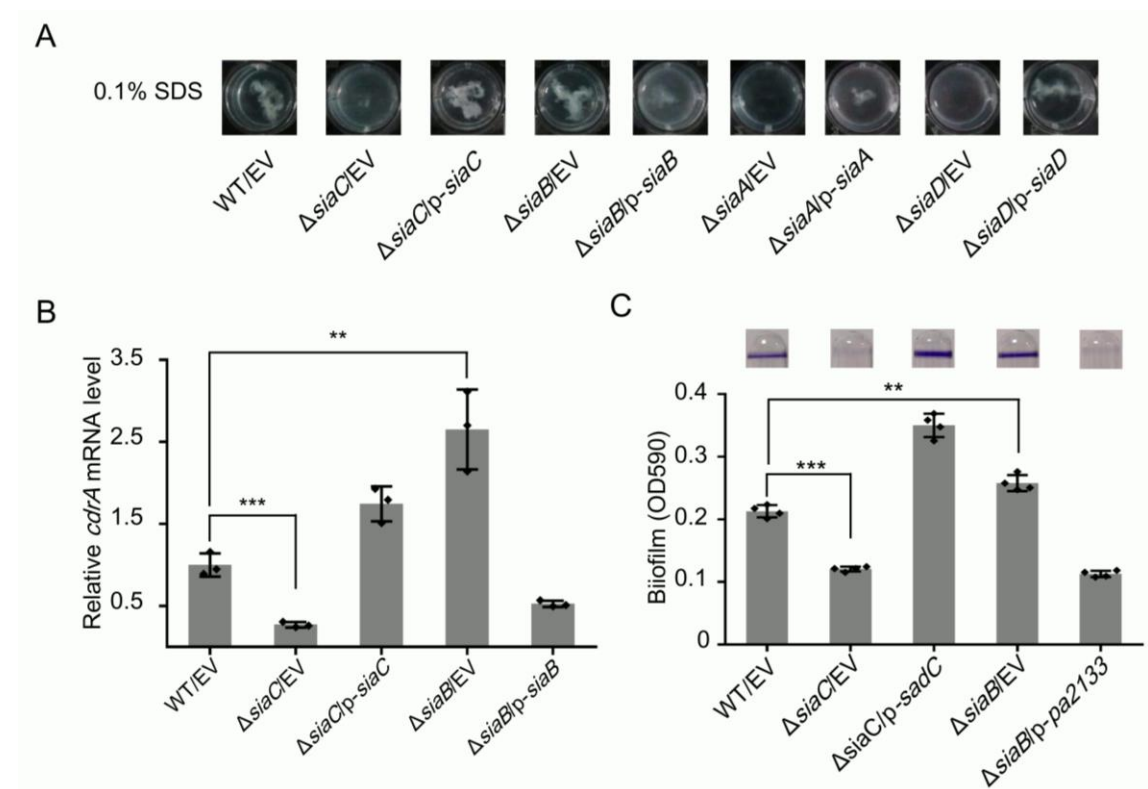

### Appendix Figure S1. SiaB and SiaC regulates aggregates via c-di-GMP.

- A** SDS-induced aggregates formation by PAO1/EV,  $\Delta siaC$ /EV,  $\Delta siaB$ /EV and the corresponding complemented strains. Strains were grown in M9 medium with 10 mM succinate or 0.1% SDS as the sole carbon source for 12 h at 37 °C with shaking at 200 rpm.
- B** The mRNA levels of *cdrA* in PAO1,  $\Delta siaC$ ,  $\Delta siaB$  and the corresponding complemented strains were detected by qRT-PCR and normalized to the level of PAO1. The 30s ribosomal protein-encoding gene *rpsL* was used as an internal control.
- C** Biofilm formation by the indicated strains was displayed with crystal violet staining (up) and quantified with optical density measurement (down). Error bars represent the means and SDs of three biological replicates. \*\* $P < 0.01$  and \*\*\* $P < 0.001$  compared to WT based on one-way ANOVA test. EV represents the empty vector pUCP20 in this and subsequent assays.

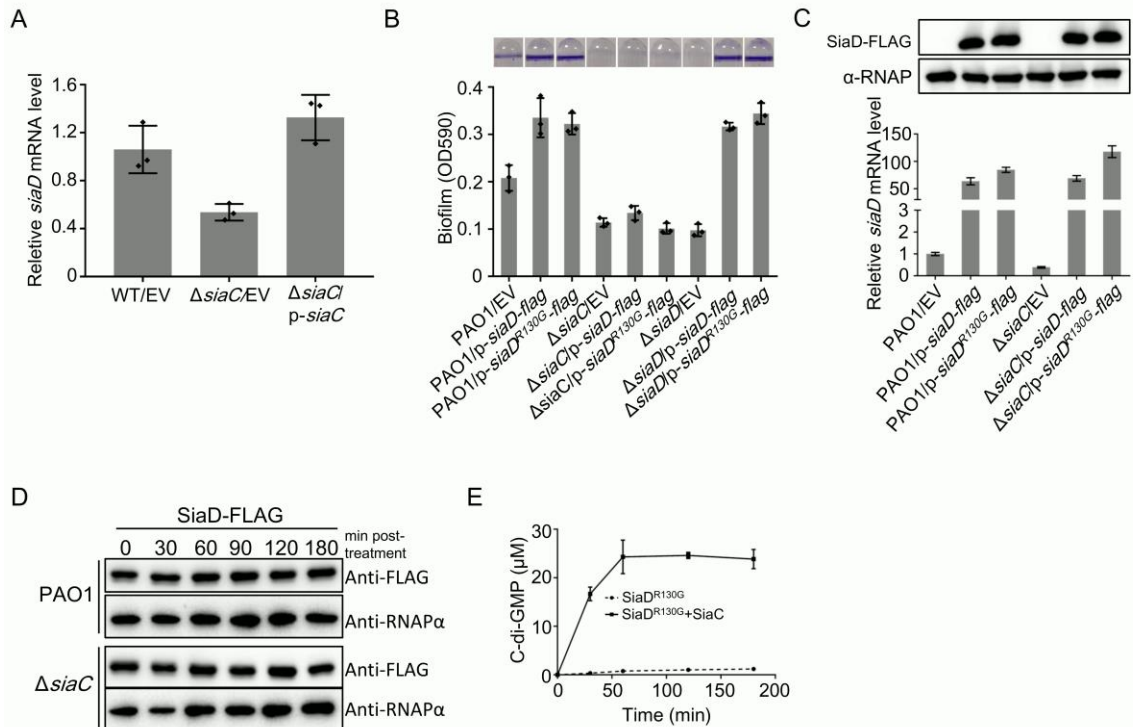

### Appendix Figure S2. SiaC is required for the DGC activity of SiaD.

- A** Expression of *siaD* was decreased after *siaC* deletion. The mRNA levels of *siaD* in PAO1,  $\Delta$ *siaC* and the corresponding complemented strains were detected by qRT-PCR and normalized to the level of PAO1.
- B** The C-terminus FLAG tag did not influence the function of SiaD. Biofilm formation by the indicated strains was displayed with crystal violet staining (up) and quantified with optical density measurement (down).
- C** SiaD was sufficiently expressed on the overexpressing plasmid. Expression levels of SiaD-Flag were tested by western blotting (up) and qRT (down). For western blotting assays, RNA polymerase alpha unit ( $\alpha$ -RNAP) was used as a control for whole cells. For qRT-PCR assays, the 30s ribosomal protein-encoding gene *rpsL* was used as an internal control.
- D** Deletion of SiaC did not influence SiaD stability. Wild type PAO1 and  $\Delta$ *siaC* mutant carrying pUCP20-*siaD*-flag were cultured for 3 h. The 50  $\mu$ g ml<sup>-1</sup> streptomycin was added to the medium. At the indicated time points, the protein levels of SiaD-FLAG were determined by western blotting assay. RNA polymerase alpha unit was used as an internal control.

E Production of c-di-GMP at the indicated time-point by SiaD<sup>R130G</sup> with SiaC was determined by HPLC.

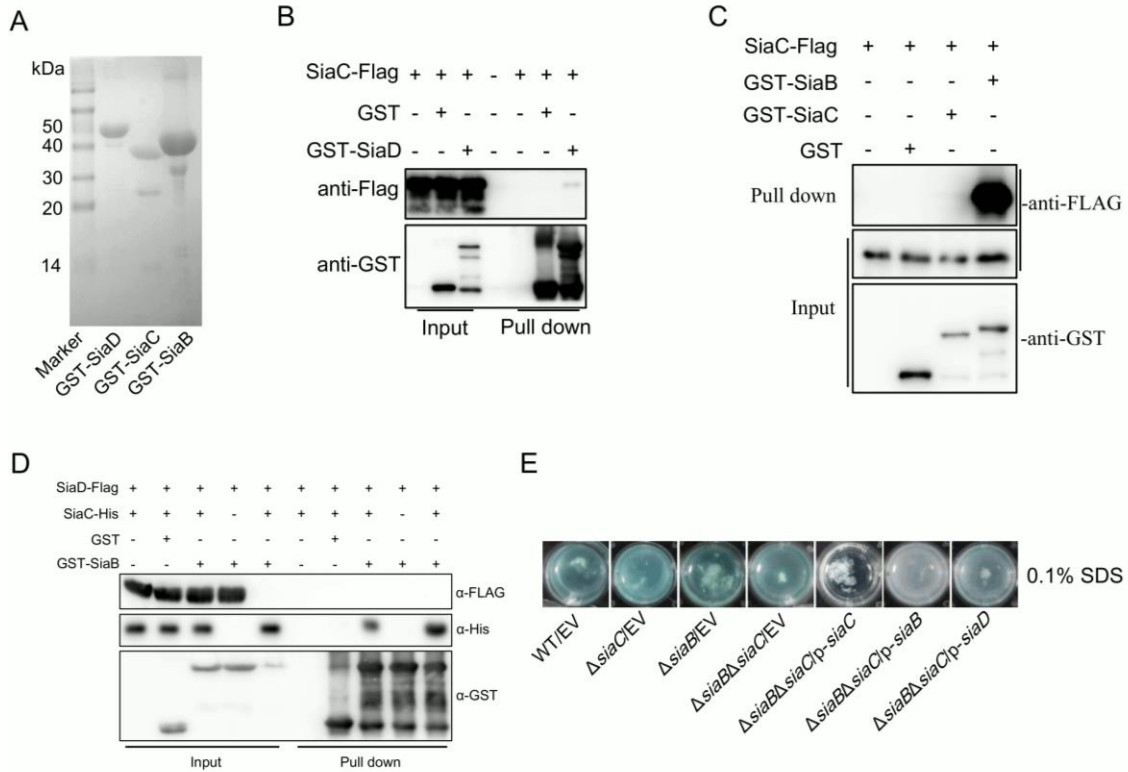

### Appendix Figure S3. SiaC interacts with SiaB or SiaD.

- A** Sodium dodecyl sulfate polyacrylamide gel electrophoresis (SDS-PAGE) analysis of purified GST-SiaD, GST-SiaC and GST-SiaB.
- B** GST pull down revealed direct interaction between SiaC and SiaD. Cell lysates of *P. aeruginosa* containing SiaC-Flag were incubated with GST and GST-SiaD individually, and protein complexes were captured by glutathione beads.
- C** GST-pull down assays showed that SiaC failed to interact with itself. Cell lysates of *P. aeruginosa* containing SiaC-Flag were incubated with GST and GST-SiaC individually, and protein complexes were captured by glutathione beads. GST-SiaB was used as a positive control.
- D** GST pull down assay showed no formation of SiaB-SiaC-SiaD complex. GST-SiaB was firstly incubated with purified SiaC-His. After SiaC-His binding, cell lysates of DH5α containing SiaD-Flag was added, and protein complex were captured by glutathione beads. GST protein was used as negative control.
- E** SDS-induced aggregates formation by the indicated strains. Strains were grown in M9 medium with 10 mM succinate or 0.1% SDS as the sole carbon source for 12 h at 37 °C with shaking at 200 rpm.

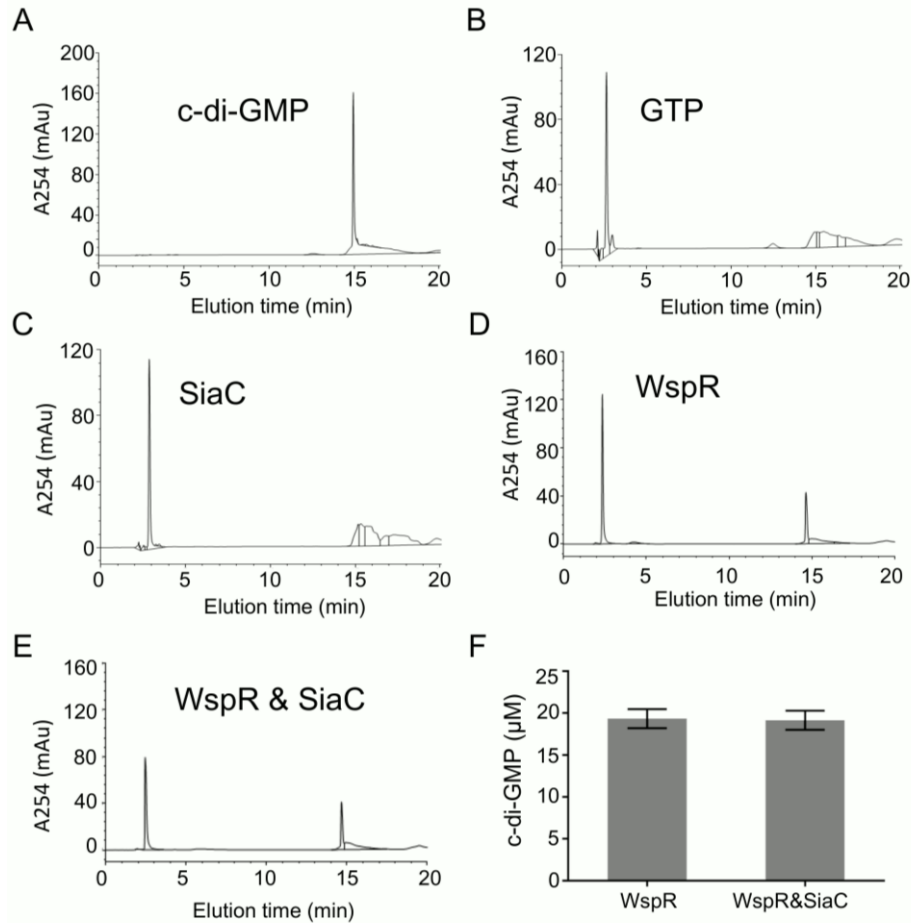

**Appendix Figure S4. SiaC is unable to promote the DGC activity of WspR.**

- A The retained times of c-di-GMP (50 μM) standard
- B The retained time of GTP (50 μM) standard.
- C-E The c-di-GMP levels produced by SiaC (C), WspR (D), or WspR with SiaC (E) after 3 h or 10 min reaction were determined.
- F Quantification analysis showed that SiaC did not promote WspR to produce more c-di-GMP production. Data are presented as the mean ± s.d. of three independent experiments.

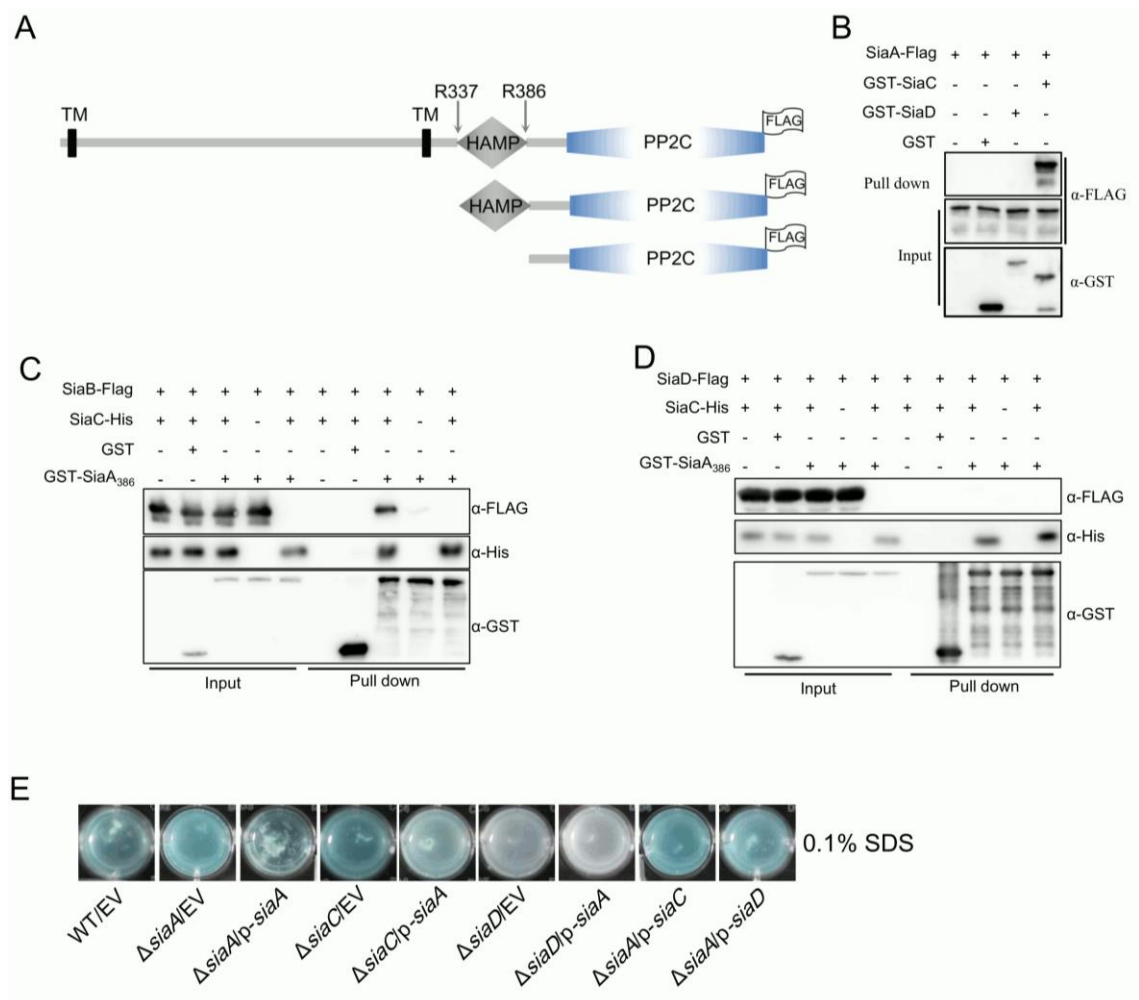

**Appendix Figure S5. SiaA regulates aggregates formation via direct interaction with SiaC.**

- A Predicted domain of SiaA.
- B GST pull-down assays showed no interaction between SiaA and SiaD. Cell lysates of *P. aeruginosa* expressing SiaA-Flag were incubated with GST and GST-SiaD individually, and protein complexes were captured by glutathione beads. GST-SiaC was used as a positive control.
- C GST pull down assay revealed formation of SiaA-SiaC-SiaB complex *in vitro*. GST-SiaA<sub>386</sub> was firstly incubated with purified SiaC-His. After SiaC-His binding, cell lysates of DH5 $\alpha$  containing SiaB-Flag was added, and protein complex were captured by glutathione beads. GST protein was used as negative control.
- D GST pull down assay showed no formation of SiaA-SiaC-SiaD complex. GST-SiaA<sub>386</sub> was firstly incubated with purified SiaC-His. After SiaC-His binding, cell



lysates of DH5 $\alpha$  containing SiaD-Flag was added, and protein complex were captured by glutathione beads. GST protein was used as negative control.

- E SDS-induced aggregates formation by the indicated strains. Strains were grown in M9 medium with 10 mM succinate or 0.1% SDS as the sole carbon source for 12 h at 37 °C with shaking at 200 rpm.

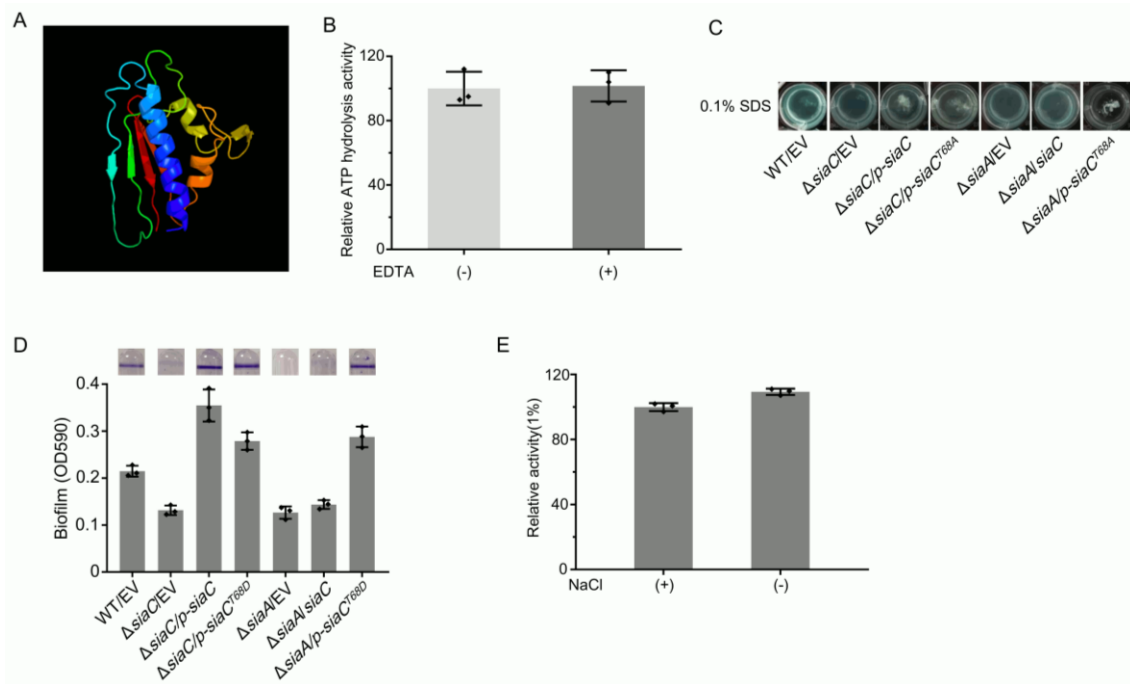

**Appendix Figure S6. SiaB is a kinase that specifically phosphorylates SiaC.**

- A** Structure modeling of SiaB using online server Phyre 2.0.
- B** SiaB retains ATP hydrolysis activity in the presence of EDTA. (-) and (+) represent reaction buffer (10 mM Tris-HCl, pH 8.0, 10 mM NaCl) with or without 1 mM EDTA.
- C** SDS-induced aggregates formation by the indicated strains. Strains were grown in M9 medium with 10 mM succinate or 0.1% SDS as the sole carbon source for 12 h at 37 °C with shaking at 200 rpm.
- D** Biofilm formation by the indicated strains was displayed with crystal violet staining (up) and quantified with optical density measurement (down).
- E** Na<sup>+</sup> ion is not strictly required for the ATP hydrolysis activity of SiaB. SiaB retains ATP hydrolysis activity in ammonium phosphate buffer without Na<sup>+</sup> (50 mM ammonium phosphate, pH 7.5).

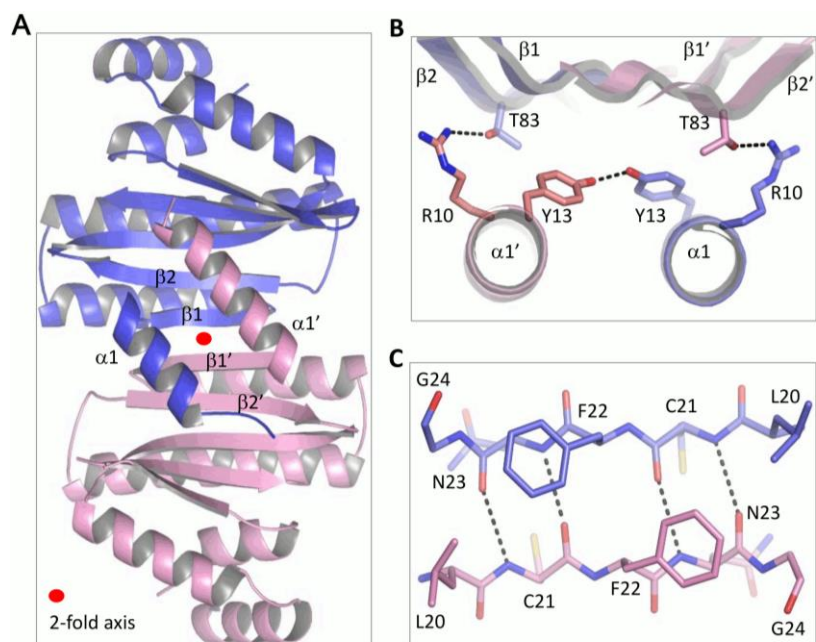

**Appendix Figure S7. Dimerization of SiaB.**

A The overall conformation of SiaB dimer. The two SiaB molecules are shown as cartoons in blue and pink, respectively.

B, C Detailed interactions between the two SiaB molecules.

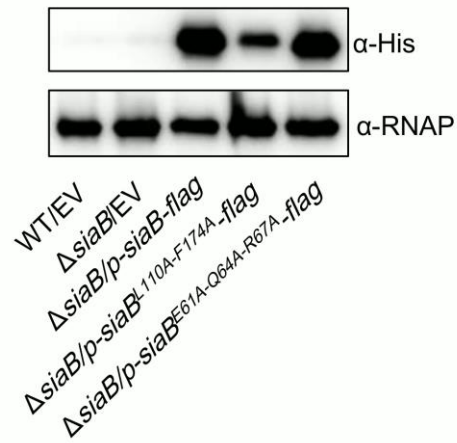

**Appendix Figure S8. Expression of SiaB and its mutants during biofilm formation.**

The biofilm formed by the indicated strains were scraped and subject to western blotting assay. The expression levels of SiaB-Flag or its mutants from these strains were determined. RNA polymerase alpha unit was used as an internal control.

# A

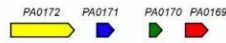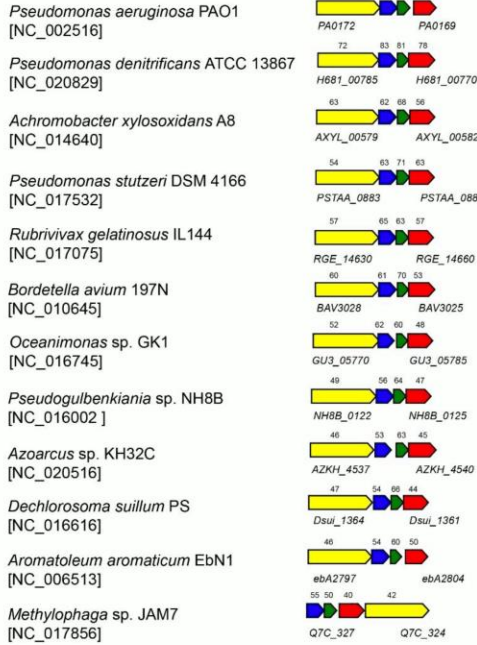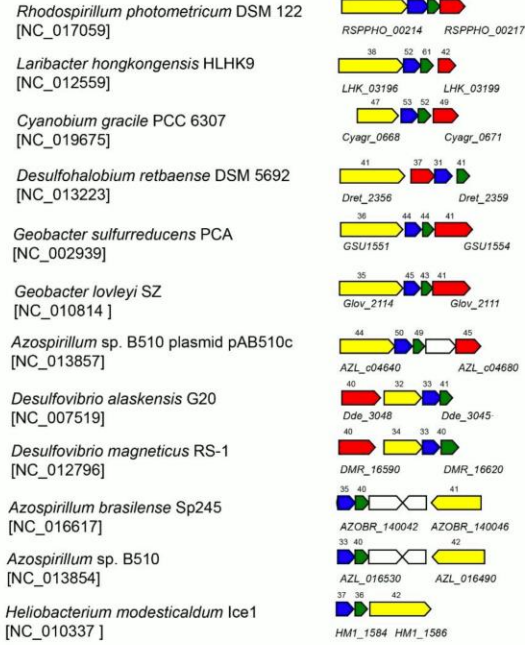

# B

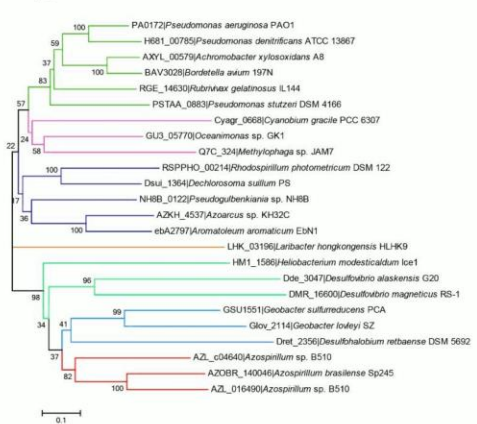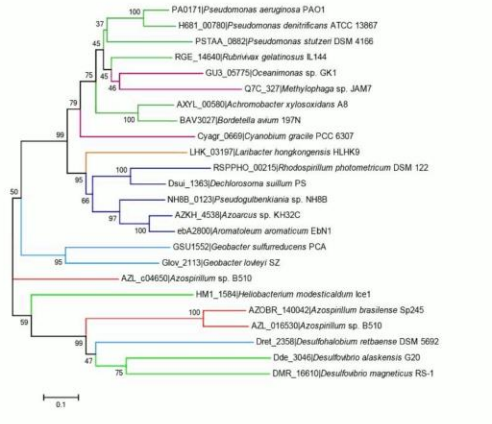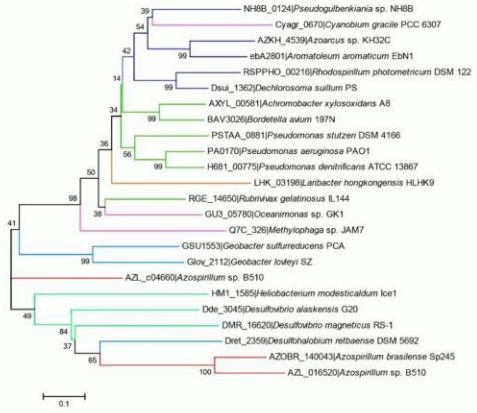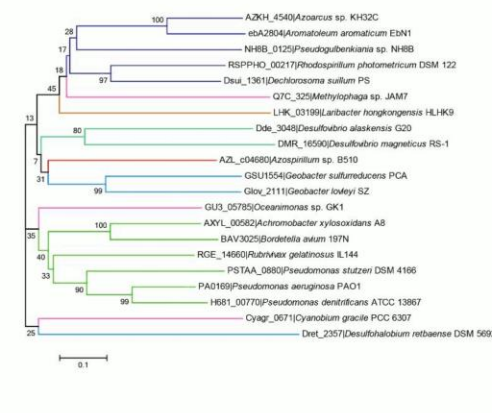

**Appendix Figure S9. Syteny and phylogeny of *siaABCD*.**

- A Genetic organization and co-linear alignment of *siaABCD*-like homologues. Sequence identities of protein homologs respectively compared to *siaABCD* prototypes are indicated above corresponding genes.
- B The phylogeny relationships of SiaABCD protein homologs were conducted in MEGA 7 by using the NJ method (bootstrap: 1000 replicates). The percentage of consensus trees are shown close to the clades.

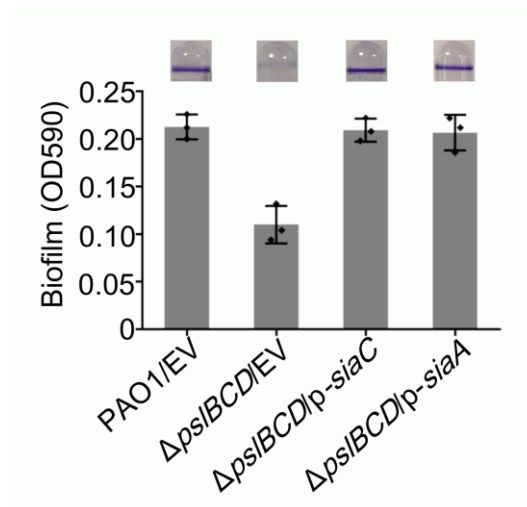

**Appendix Figure S10. The activity of SiaD is independent on exopolysaccharide Psl.** Biofilm formation by the indicated strains was displayed with crystal violet staining (up) and quantified with optical density measurement (down).

## Appendix Tables

**Appendix Table S1. Data collection and refinement statistics**

| Structure<br>(PDB ID)                         | SiaB/SiaC complex<br>6KKO | apo-SiaC<br>6KKP |
|-----------------------------------------------|---------------------------|------------------|
| <b>Data collection<sup>a</sup></b>            |                           |                  |
| Space group                                   | P2 <sub>1</sub>           | I222             |
| Cell parameter                                |                           |                  |
| a (Å)                                         | 75.6                      | 35.6             |
| b (Å)                                         | 42.0                      | 72.1             |
| c (Å)                                         | 96.6                      | 96.1             |
| β (°)                                         | 93.45                     | 90.0             |
| Wavelength (Å)                                | 0.9793                    | 0.9793           |
| Resolution (Å)                                | 39.6-2.1                  | 30-2.5           |
| Last shell (Å)                                | 2.24-2.1                  | 2.59-2.5         |
| Completeness (%) <sup>a</sup>                 | 98.7 (97.5)               | 98.5 (95.2)      |
| Redundancy <sup>a</sup>                       | 3.3(3.3)                  | 6.4 (3.8)        |
| I/σ(I) <sup>a</sup>                           | 9.4(2.0)                  | 15.4 (4.5)       |
| Rmerge (%) <sup>a</sup>                       | 8.4/57.4                  | 13.0/26.3        |
| <b>Refinement</b>                             |                           |                  |
| Resolution (Å)                                | 37.7-2.1                  | 30.0-2.5         |
| R <sub>work</sub> (%) / R <sub>free</sub> (%) | 23.2/27.8                 | 20.9/25.1        |
| No. of atoms                                  |                           |                  |
| Protein                                       | 4633                      | 966              |
| Ligand                                        | 54                        | 0                |
| water                                         | 135                       | 11               |
| R. m. s. deviations                           |                           |                  |
| Bond length (Å)                               | 0.005                     | 0.007            |
| Bond angle (°)                                | 0.757                     | 1.164            |
| Ramachandran plot (%)                         |                           |                  |



|                    |      |      |
|--------------------|------|------|
| Most favored       | 99.1 | 94.9 |
| Additional allowed | 0.9  | 5.1  |

<sup>a</sup>: Values in parentheses are for the last resolution shell.

**Appendix Table S2. Strains and plasmids used in this study.**

| Strains or plasmids                           | Relevant characteristics or function                                                         | Reference or origin                      |
|-----------------------------------------------|----------------------------------------------------------------------------------------------|------------------------------------------|
| <b>Plasmids</b>                               |                                                                                              |                                          |
| mini-CTX- <i>lacZ</i>                         | Integration plasmid; TcR <sup>a</sup>                                                        | (Becher & Schweizer, 2000)               |
| mini-CTX- <i>lacZ-siaD</i> -flag              |                                                                                              | This study                               |
| pEX18Tc                                       | <i>oriT+</i> <i>sacB+</i> gene replacement vector with multiple-cloning site from pUC18; TcR | (Hoang, Karkhoff-Schweizer et al., 1998) |
| pEX- <i>siaC</i>                              | <i>siaC</i> deletion plasmid; TcR                                                            | This study                               |
| pEX- <i>siaB</i>                              | <i>siaB</i> deletion plasmid; TcR                                                            | This study                               |
| pEX- <i>siaB-C</i>                            | <i>siaC-siaB</i> double deletion plasmid; Tc <sup>r</sup>                                    | This study                               |
| pEX- <i>siaA</i>                              | <i>siaA</i> deletion plasmid, Tc <sup>r</sup>                                                | This study                               |
| pEX- <i>siaD</i>                              | <i>siaD</i> deletion plasmid, Tc <sup>r</sup>                                                | This study                               |
| pUCP20                                        | <i>Escherichia-Pseudomonas</i> shuttle vector                                                | (West, Schweizer et al., 1994)           |
| pUCP20- <i>siaC</i>                           | pUCP20 derived plasmid expressing <i>siaC</i> ; Amp <sup>r</sup>                             | This study                               |
| pUCP20- <i>siaC</i> <sup>T68A</sup>           | pUCP20 derived plasmid expressing <i>siaC</i> <sup>T68A</sup> ; Amp <sup>r</sup>             | This study                               |
| pUCP20- <i>siaC</i> <sup>K72A</sup>           | pUCP20 derived plasmid expressing <i>siaC</i> <sup>K72A</sup> ; Amp <sup>r</sup>             | This study                               |
| pUCP20- <i>siaC</i> <sup>E33A</sup>           | pUCP20 derived plasmid expressing <i>siaC</i> <sup>E33A</sup> ; Amp <sup>r</sup>             | This study                               |
| pUCP20- <i>siaC</i> <sup>Y65A</sup>           | pUCP20 derived plasmid expressing <i>siaC</i> <sup>Y65A</sup> ; Amp <sup>r</sup>             | This study                               |
| pUCP20- <i>siaC</i> <sup>N67A</sup>           | pUCP20 derived plasmid expressing <i>siaC</i> <sup>N67A</sup> ; Amp <sup>r</sup>             | This study                               |
| pUCP20- <i>siaC</i> <sup>R103A</sup>          | pUCP20 derived plasmid expressing <i>siaC</i> <sup>R103A</sup> ; Amp <sup>r</sup>            | This study                               |
| pUCP20- <i>siaC</i> <sup>E110A</sup>          | pUCP20 derived plasmid expressing <i>siaC</i> <sup>E110A</sup> ; Amp <sup>r</sup>            | This study                               |
| pUCP20- <i>siaB</i>                           | pUCP20 derived plasmid expressing <i>siaB</i> ; Amp <sup>r</sup>                             | This study                               |
| pUCP20- <i>siaB</i> <sup>E32A</sup>           | pUCP20 derived plasmid expressing <i>siaB</i> <sup>E32A</sup> ; Amp <sup>r</sup>             | This study                               |
| pUCP20- <i>siaB</i> <sup>E61A</sup>           | pUCP20 derived plasmid expressing <i>siaB</i> <sup>E61A</sup> ; Amp <sup>r</sup>             | This study                               |
| pUCP20- <i>siaB</i> <sup>Q64A</sup>           | pUCP20 derived plasmid expressing <i>siaB</i> <sup>Q64A</sup> ; Amp <sup>r</sup>             | This study                               |
| pUCP20- <i>siaB</i> <sup>E61A-Q64A</sup>      | pUCP20 derived plasmid expressing <i>siaB</i> <sup>E61A-Q64A</sup> ; Amp <sup>r</sup>        | This study                               |
| pUCP20- <i>siaB</i> <sup>E61A-Q64A-R67A</sup> | pUCP20 derived plasmid expressing <i>siaB</i> <sup>E61A-Q64A-R67A</sup> ; Amp <sup>r</sup>   | This study                               |
| pUCP20- <i>siaB</i> <sup>N65A</sup>           | pUCP20 derived plasmid expressing <i>siaB</i> <sup>N65A</sup> ; Amp <sup>r</sup>             | This study                               |
| pUCP20- <i>siaB</i> <sup>Y69A</sup>           | pUCP20 derived plasmid expressing <i>siaB</i> <sup>Y69A</sup> ; Amp <sup>r</sup>             | This study                               |
| pUCP20- <i>siaB</i> <sup>N100A</sup>          | pUCP20 derived plasmid expressing <i>siaB</i> <sup>N100A</sup> ; Amp <sup>r</sup>            | This study                               |
| pUCP20- <i>siaB</i> <sup>L110A</sup>          | pUCP20 derived plasmid expressing <i>siaB</i> <sup>L110AA</sup> ; Amp <sup>r</sup>           | This study                               |
| pUCP20- <i>siaB</i> <sup>F174A</sup>          | pUCP20 derived plasmid expressing <i>siaB</i> <sup>F174A</sup> ; Amp <sup>r</sup>            | This study                               |
| pUCP20- <i>siaB</i> <sup>L110A-F174A</sup>    | pUCP20 derived plasmid expressing <i>siaB</i> <sup>L110A-F174A</sup> ; Amp <sup>r</sup>      | This study                               |
| pUCP20- <i>siaA</i>                           | pUCP20 derived plasmid expressing <i>siaA</i> ; Amp <sup>r</sup>                             | This study                               |
| pUCP20- <i>siaD</i>                           | pUCP20 derived plasmid expressing <i>siaD</i> ; Amp <sup>r</sup>                             | This study                               |

|                                             |                                                                                                                                                      |            |
|---------------------------------------------|------------------------------------------------------------------------------------------------------------------------------------------------------|------------|
| pUCP20- <i>siaD</i> <sup>G140A</sup>        | pUCP20 derived plasmid expressing <i>siaD</i> <sup>G140A</sup> ; Amp <sup>r</sup>                                                                    | This study |
| pUCP20- <i>siaC-siaD</i>                    | pUCP20 derived plasmid expressing <i>siaC</i> and <i>siaD</i> ; Amp <sup>r</sup>                                                                     | This study |
| pUCP20- <i>siaC-siaD</i> <sup>G140A</sup>   | pUCP20 derived plasmid expressing <i>siaC</i> and <i>siaD</i> <sup>G140A</sup> ; Amp <sup>r</sup>                                                    | This study |
| pUCP20- <i>sadC</i>                         | pUCP20 derived plasmid expressing <i>sadC</i> ; Amp <sup>r</sup>                                                                                     | This study |
| pUCP20- <i>PA2133</i>                       | pUCP20 derived plasmid expressing <i>PA2133</i> ; Amp <sup>r</sup>                                                                                   | This study |
| pUCP20- <i>siaD-flag</i>                    | pUCP20 derived plasmid expressing <i>SiaD-FLAG</i> ; Amp <sup>r</sup>                                                                                | This study |
| pMMB67EH                                    | <i>Escherichi-Pseudomonas</i> Shuttle vector between; Amp <sup>r</sup>                                                                               | S. Jin lab |
| pMMB67EH-Flag                               | pMMB67EH vector with FLAG tag coding sequence                                                                                                        | This study |
| pMMB67EH- <i>siaD</i> -Flag                 | pMMB67EH-Flag derived plasmid expressing <i>siaD-flag</i>                                                                                            | This study |
| pMMB67EH- <i>siaC</i> -Flag                 | pMMB67EH-Flag derived plasmid expressing <i>siaC-flag</i>                                                                                            | This study |
| pMMB67EH- <i>siaC</i> <sup>T68A</sup> -Flag | pMMB67EH-Flag derived plasmid expressing <i>siaC</i> <sup>T68A</sup> - <i>flag</i>                                                                   | This study |
| pMMB67EH- <i>siaB</i> -Flag                 | pMMB67EH-Flag derived plasmid expressing <i>siaB-flag</i>                                                                                            | This study |
| pMMB67EH- <i>siaA</i> -Flag                 | pMMB67EH-Flag derived plasmid expressing <i>siaA-flag</i>                                                                                            | This study |
| pMMB67EH- <i>siaA337</i> -Flag              | pMMB67EH-Flag derived plasmid expressing <i>siaA337-flag</i>                                                                                         | This study |
| pMMB67EH- <i>siaA386</i> -Flag              | pMMB67EH-Flag derived plasmid expressing <i>siaA386-flag</i>                                                                                         | This study |
| pBT                                         | p15A origin of replication, <i>lac-UV5</i> promoter, $\lambda$ cI open reading frame; Cm <sup>r</sup>                                                | Agilent    |
| pTRG                                        | ColE1 origin of replication, <i>lpp</i> promoter, <i>lac-UV5</i> promoter, $\alpha$ -RNAP open reading frame; Tc <sup>r</sup>                        | Agilent    |
| pBT-LGF2                                    | Interaction control plasmid encoding the dimerization domain (40 amino acid residues) of the Gal4 transcriptional activator protein; Cm <sup>r</sup> | Agilent    |
| pTRG-Gal11                                  | Interaction control plasmid encoding a domain (90 amino acid residues) of the mutant form of the Gal11 protein; Tc <sup>r</sup>                      | Agilent    |
| pTRG- <i>siaD</i>                           | pTRG vector inserted with <i>siaD</i> coding sequence                                                                                                | This study |
| pTRG- <i>siaC</i>                           | pTRG vector inserted with <i>siaC</i> coding sequence                                                                                                | This study |
| pTRG- <i>siaA337</i>                        | pTRG vector inserted with <i>siaA337</i> coding sequence                                                                                             | This study |
| pTRG- <i>siaA386</i>                        | pTRG vector inserted with <i>siaA386</i> coding sequence                                                                                             | This study |
| pBT- <i>siaD</i>                            | pBT vector inserted with <i>siaD</i> coding sequence                                                                                                 | This study |
| pBT- <i>siaC</i>                            | pBT vector inserted with <i>siaC</i> coding sequence                                                                                                 | This study |
| pBT- <i>siaB</i>                            | pBT vector inserted with <i>siaB</i> coding sequence                                                                                                 | This study |
| pGEX-6p-1                                   | Expression vector with N-terminal GST tag, Apr                                                                                                       | Novagen    |
| pGEX- <i>siaD</i>                           | Plasmid for GST- <i>SiaD</i> expression                                                                                                              | This study |
| pGEX- <i>siaC</i>                           | Plasmid for GST- <i>SiaC</i> expression                                                                                                              | This study |
| pGEX- <i>siaB</i>                           | Plasmid for GST- <i>SiaB</i> expression                                                                                                              | This study |
| pET- <i>siaC</i>                            | Plasmid for <i>SiaC</i> -His expression                                                                                                              | This study |

|                                              |                                                                    |                         |
|----------------------------------------------|--------------------------------------------------------------------|-------------------------|
| pET- <i>siaC</i> <sup>T68A</sup>             | Plasmid for <i>SiaC</i> <sup>T68A</sup> -His expression            | This study              |
| pET-Sumo                                     | Plasmid for Sumo expression                                        | (Yang, Wu et al., 2018) |
| pSumo- <i>SiaA</i> <sub>386</sub>            | Plasmid for Sumo- <i>SiaA</i> <sub>386</sub> expression            | This study              |
| pSumo- <i>siaD</i>                           | Plasmid for Sumo- <i>SiaD</i> expression                           | This study              |
| pSumo- <i>siaC</i>                           | Plasmid for Sumo- <i>SiaC</i> expression                           | This study              |
| pSumo- <i>siaC</i> <sup>T68A</sup>           | Plasmid for Sumo- <i>SiaC</i> <sup>T68A</sup> expression           | This study              |
| pSumo- <i>siaC</i> <sup>K72A</sup>           | Plasmid for Sumo- <i>SiaC</i> <sup>K72A</sup> expression           | This study              |
| pSumo- <i>siaC</i> <sup>E33A</sup>           | Plasmid for Sumo- <i>SiaC</i> <sup>E33A</sup> expression           | This study              |
| pSumo- <i>siaB</i>                           | Plasmid for Sumo- <i>SiaB</i> expression                           | This study              |
| pSumo- <i>siaB</i> <sup>E61A-Q64A-R67A</sup> | Plasmid for Sumo- <i>SiaB</i> <sup>E61A-Q64A-R67A</sup> expression | This study              |
| pSumo- <i>siaB</i> <sup>L110A-F174A</sup>    | Plasmid for Sumo- <i>SiaB</i> <sup>L110A-F174A</sup> expression    | This study              |

### Strains

#### *P. aeruginosa*

|                                           |                                                 |            |
|-------------------------------------------|-------------------------------------------------|------------|
| PAO1                                      | Wild type                                       | This lab   |
| $\Delta$ <i>siaC</i>                      | <i>siaC</i> deletion mutant of PAO1             | This study |
| $\Delta$ <i>siaB</i>                      | <i>siaB</i> deletion mutant of PAO1             | This study |
| $\Delta$ <i>siaA</i>                      | <i>siaA</i> deletion mutant of PAO1             | This study |
| $\Delta$ <i>siaD</i>                      | <i>siaD</i> deletion mutant of PAO1             | This study |
| $\Delta$ <i>siaC</i> $\Delta$ <i>siaB</i> | <i>siaC-siaB</i> double deletion mutant of PAO1 | This study |
| $\Delta$ <i>siaB</i> $\Delta$ <i>siaC</i> | <i>SiaB-siaC</i> double deletion mutant of PAO1 |            |
| $\Delta$ <i>sadC</i>                      | <i>sadC</i> deletion mutant of PAO1             | This lab   |

#### *E. coli*

|              |                                                                                                                                                                                                                                               |            |
|--------------|-----------------------------------------------------------------------------------------------------------------------------------------------------------------------------------------------------------------------------------------------|------------|
| DH5 $\alpha$ | F- $\phi$ 80 <i>lacZ</i> $\Delta$ <i>M15</i> $\Delta$ ( <i>lacZYA-argF</i> ) <i>U169</i> <i>recA1</i> <i>endA1</i><br><i>hsdR17</i> ( <i>rk-</i> , <i>mk+</i> ) <i>phoA</i> <i>supE44</i> <i>thi-1</i> <i>gyrA96</i> <i>relA1</i> <i>tonA</i> | Invitrogen |
| BL21(DE3)    | F- <i>ompT</i> <i>hsdS<sub>B</sub></i> ( <i>r<sub>B</sub>-m<sub>B</sub>-</i> ) <i>gal</i> <i>dcm</i> (DE3)                                                                                                                                    | Invitrogen |

---

**Table S3. Primes used in this study.**

| Primer                | Sequence (5'→3') <sup>a</sup>      | Application                                  |
|-----------------------|------------------------------------|----------------------------------------------|
| mini- <i>siaD</i> -F1 | TTActcgagAACCGCCTCTGAGCGGGAT       | For constructing mini-CTX- <i>siaD</i> -Flag |
| mini- <i>siaD</i> -R1 | GCGCTCCAGCCGCACGGCTATCCCTATCAG     | For constructing mini-CTX- <i>siaD</i> -Flag |
| mini- <i>siaD</i> -F2 | CTGATAGGGATAGCCGTGCGGCTGGAGCGC     | For constructing mini-CTX- <i>siaD</i> -Flag |
| mini- <i>siaD</i> -R2 | CCCaaagcttGCGCGCTGGAGCCGGGCG       | For constructing mini-CTX- <i>siaD</i> -Flag |
| pUC- <i>siaC</i> -F   | AGCgaattcCGTGTTTTAGGAAGAACACCATC   | For constructing pUCP- <i>siaC</i>           |
| pUC- <i>siaC</i> -R   | CCCaaagcttCTACTCGTCGTGGGCCTG       | For constructing pUCP- <i>siaC</i>           |
| <i>siaC</i> -E33A –F  | GGCGATTCTACCCGGCAAACCTCTATGAACT    | For <i>siaC</i> E33A mutation                |
| <i>siaC</i> -E33A –R  | AGTTCATAGGAGTTTGCCGGGTAGGAATCGCC   | For <i>siaC</i> E33A mutation                |
| <i>siaC</i> -Y65A –F  | CGCCTGCTGGCCCTGAACACCAGTTCGAT      | For <i>siaC</i> Y65A mutation                |
| <i>siaC</i> -Y65A –R  | ATCGAACTGGTGTTCAGGGCCAGCAGGCG      | For <i>siaC</i> Y65A mutation                |
| <i>siaC</i> -N67A –F  | CTGTACCTGGCCACCAGTTCGATCAAGGCCAT   | For <i>siaC</i> N67A mutation                |
| <i>siaC</i> -N67A –R  | ATGGCCTTGATCGAACTGGTGGCCAGGTACAG   | For <i>siaC</i> N67A mutation                |
| <i>siaC</i> -K72A –F  | AACACCAGTTCGATCGCGGCCATGATGGACATC  | For <i>siaC</i> K72A mutation                |
| <i>siaC</i> -K72A –R  | GATGTCCATCATGGCCGCGATCGAACTGGTGT   | For <i>siaC</i> K72A mutation                |
| <i>siaC</i> -R103A –F | GACCGGCGCAACGAAGCGGTGCGCGAGCTGGC   | For <i>siaC</i> R103A mutation               |
| <i>siaC</i> -R103A –R | GCCAGCTCGGCGACCCTTCGTTGCGCCGGTC    | For <i>siaC</i> R103A mutation               |
| <i>siaC</i> -E110A –F | GCCGAGCTGGCCGAGGCGTTCCGCGAGGACTGC  | For <i>siaC</i> E110A mutation               |
| <i>siaC</i> -E110A –R | GCAGTCTCGCGGAACGCCTCGGCCAGCTCGGC   | For <i>siaC</i> E110A mutation               |
| pUC- <i>siaB</i> -F   | AGCgaattcCCTTCCGATTCGACTAGGGG      | For constructing pUCP- <i>siaB</i>           |
| pUC- <i>siaB</i> -R   | CCCaaagcttTCAGATCACGGCGCGCAG       | For constructing pUCP- <i>siaB</i>           |
| <i>siaB</i> -E61A-F   | GTGTACATCGCCATGACCCAGAACATCCGC     | For <i>siaB</i> -E61A mutation               |
| <i>siaB</i> -E61A-R   | GCGGATGTTCTGGGTTCATGGCGATGTACAC    | For <i>siaB</i> -E61A mutation               |
| <i>siaB</i> -Q64A-F   | GAGATGACCGCCAACATCCGCCACTACGCC     | For <i>siaB</i> -Q64A mutation               |
| <i>siaB</i> -Q64A-R   | GGCGTAGTGGCGGATGTTGGCGGTCATCTC     | For <i>siaB</i> -Q64A mutation               |
| <i>siaB</i> -R67A-F   | CAGAACATCGCCACTACGCCAATCTCAAGGGCTA | For <i>siaB</i> -R67A mutation               |
| <i>siaB</i> -R67A-R   | TAGCCCTTGAGATTGGCGTAGTGGCGATGTTCTG | For <i>siaB</i> -R67A mutation               |
| <i>siaB</i> -N65A-F   | TCGAGATGACCCAGGCCATCCGCCACTACGC    | For <i>siaB</i> N65A mutation                |
| <i>siaB</i> -N65A-R   | GCGTAGTGGCGGATGGCCTGGGTCATCTCGA    | For <i>siaB</i> N65A mutation                |
| <i>siaB</i> -N100A-F  | GTGGTGTCCGCCGCGCCCTGGTGAACGCGAC    | For <i>siaB</i> N100A mutation               |
| <i>siaB</i> -N100A-R  | GTCGCGTTCCACCAGGGCGCCGGCGGACACCAC  | For <i>siaB</i> N100A mutation               |
| <i>siaB</i> -Y69A-F   | CAGAACATCCGCCACGCCCAATCTCAAGGGC    | For <i>siaB</i> Y69A mutation                |
| <i>siaB</i> -Y69A-R   | GCCCTTGAGATTGGCGGCGTGGCGGATGTTCTG  | For <i>siaB</i> Y69A mutation                |
| <i>siaB</i> -L110A-F  | GACGACGGCCAGAGCGCGGTGCGCAGCATCCAG  | For <i>siaB</i> L110A mutation               |
| <i>siaB</i> -L110A-R  | CTGGATGCTGCGCACCGCGCTCTGGCCGTCGTC  | For <i>siaB</i> L110A mutation               |

|                                     |                                                                 |                                                             |
|-------------------------------------|-----------------------------------------------------------------|-------------------------------------------------------------|
| <i>siaB</i> -F174A-R                | AGCgaattcTCAGATCACGGCGCGCAGGCTGGCGAA<br>GGCGCGCCCGTCGGG         | For <i>siaB</i> F174A mutation                              |
| pUC- <i>siaA</i> -F                 | AGCgaattcCAACCTGCTCGCCGGCCT                                     | For constructing pUCP- <i>siaA</i>                          |
| pUC- <i>siaA</i> -R                 | AGCaaagcttGTCCGTTGAAGCAGAGCAGGATG                               | For constructing pUCP- <i>siaA</i>                          |
| pUC- <i>siaD</i> -F                 | AGCgaattcGGACCTGCGCCTGCTGTACC                                   | For constructing pUCP- <i>siaD</i>                          |
| pUC- <i>siaD</i> -R                 | CCCaaagcttTCAGCGCGCTGGAGCCGGG                                   | For constructing pUCP- <i>siaD</i>                          |
| pUC- <i>siaD</i> -flag-R            | CCCaaagcttTCACTTGTATCGTCGTCTTGTAG<br>TCGCGCGCTGGAGCCGGG         | For constructing pUCP- <i>siaD</i> -flag                    |
| <i>siaD</i> -G-F                    | GCCGCTGGGGCGCCGAGGAATTCCTC                                      | For constructing pUCP- <i>siaD</i> <sup>R130G</sup>         |
| <i>siaD</i> -G-R                    | GAGGAATTCCTCGGGCCCCAGCGGC                                       | For constructing pUCP- <i>siaD</i> <sup>R130G</sup>         |
| pUC- <i>sadC</i> -F                 | AGCgaattc CAGTCGACGATCGAGTCGGAC                                 | For constructing pUCP- <i>sadC</i>                          |
| pUC- <i>sadC</i> -R                 | CCCaaagcttTCAGGCACTGGTGACCTCCC                                  | For constructing pUCP- <i>sadC</i>                          |
| pUC-PA2133-F                        | AGCgaattcGTGAACGGTTCCCCACAGG                                    | For constructing pUCP-PA2133                                |
| pUC-PA2133-R                        | AGCaaagcttTCACCCCTGGCGGCTCGC                                    | For constructing pUCP-PA2133                                |
| pmm-up                              | TGCctgcacaagcttGACTACAAGGACGACGATGA<br>CAAGGATTACAAAGATGACGACGA | For constructing pMMB67EH-Flag                              |
| pmm-down                            | GCAgatatcTCATTTATCATCATCGTCCTTATAG<br>TCCTTATCGTCGTATCTTTGTAAT  | For constructing pMMB67EH-Flag                              |
| pmm- <i>siaC</i> -F                 | AGCgaattcATGAGTGACCTGCACATACCCG                                 | For constructing pMMB67EH- <i>siaC</i> -Flag                |
| pmm- <i>siaC</i> -R                 | CCCaaagcttCTCGTCGTGGGCCTGGAT                                    | For constructing pMMB67EH- <i>siaC</i> -Flag                |
| pmm- <i>siaB</i> -F                 | AGCgaattcATGGAAACGCTAGACCTGCTG                                  | For constructing pMMB67EH- <i>siaB</i> -Flag                |
| pmm- <i>siaB</i> -R                 | CCCaaagcttGATCACGGCGCGCAGGCT                                    | For constructing pMMB67EH- <i>siaB</i> -Flag                |
| pmm- <i>siaA</i> -F                 | AGCgaattcATGGCGGCGAACTGGGGG                                     | For constructing pMMB67EH- <i>siaA</i> -Flag                |
| pmm- <i>siaA</i> -R                 | CCCaaagcttGTGGAATCGGAAGGACAGGAT                                 | For constructing pMMB67EH- <i>siaA</i> -Flag                |
| pmm- <i>siaD</i> -F                 | AGCgagctcATGCGGCTGGAGCGCATCG                                    | For constructing pMMB67EH- <i>siaD</i> -Flag                |
| pmm- <i>siaD</i> -R                 | CCCaaagcttGCGCGCTGGAGCCGGGCG                                    | For constructing pMMB67EH- <i>siaD</i> -Flag                |
| pmm- <i>siaA</i> <sup>337</sup> -F  | AGCgaattcCGCCTGCTGTTGCGCCCC                                     | For constructing pMMB67EH- <i>siaA</i> <sup>337</sup> -Flag |
| pmm- <i>siaA</i> <sup>386</sup> -F  | AGCgaattcCGGCACACCGCCGAGCTG                                     | For constructing pMMB67EH- <i>siaA</i> <sup>386</sup> -Flag |
| ptrg- <i>siaC</i> -F                | AGCggatccAGTGACCTGCACATACCCGG                                   | For constructing pTRG- <i>siaC</i>                          |
| ptrg- <i>siaC</i> -R                | AGCgaattcCTACTCGTCGTGGGCCTGG                                    | For constructing pTRG- <i>siaC</i>                          |
| ptrg- <i>siaA</i> <sup>337</sup> -F | AGCggatccCGCCTGCTGTTGCGCCCC                                     | For constructing pTRG- <i>siaA</i> <sup>337</sup>           |
| ptrg- <i>siaA</i> <sup>337</sup> -R | AGCgaattcCTAGTCGAATCGGAAGGACAGG                                 | For constructing pTRG- <i>siaA</i> <sup>337</sup>           |
| ptrg- <i>siaA</i> <sup>386</sup> -F | AGCggatccCGGCACACCGCCGAGCTG                                     | For constructing pTRG- <i>siaA</i> <sup>386</sup>           |
| ptrg- <i>siaA</i> <sup>386</sup> -R | AGCgaattcCTAGTCGAATCGGAAGGACAGG                                 | For constructing pTRG- <i>siaA</i> <sup>386</sup>           |
| <i>siaD</i> -bam-F                  | AGCggatccCGGCTGGAGCGCATCGCC                                     | For constructing pBT- <i>siaD</i> and pTRG- <i>siaD</i>     |
| <i>siaD</i> -sal1-R                 | CCGgtcgacTCAGCGCGCTGGAGCCGG                                     | For constructing pBT- <i>siaD</i> and pTRG- <i>siaD</i>     |
| pbt- <i>siaB</i> -F                 | AGCgaattccATGGAAACGCTAGACCTGCTG                                 | For constructing pBT- <i>siaB</i>                           |

|                                    |                                    |                                                                                         |
|------------------------------------|------------------------------------|-----------------------------------------------------------------------------------------|
| pbt- <i>siaB</i> -R                | AGCg gatccTCAGATCACGGCGCGCAG       | For constructing pBT- <i>siaB</i>                                                       |
| pbt- <i>siaC</i> -F                | AGCgaattccATGAGTGACCTGCACATACCCG   | For constructing pBT- <i>siaC</i>                                                       |
| pbt- <i>siaC</i> -R                | AGCg gatccCTACTCGTCTGGGCCTGG       | For constructing pBT- <i>siaC</i>                                                       |
| <i>siaA</i> <sub>386</sub> -ecor-F | AGCgaattcCACACCGCCGAGCTGGAA        | For constructing pSumo- <i>siaA</i> <sub>386</sub> and pGEX- <i>siaA</i> <sub>386</sub> |
| <i>siaA</i> <sub>386</sub> -hind-R | CCCaa gcttCTAGTTCGAATCGGAAGGACAGG  | For constructing pSumo- <i>siaA</i> <sub>386</sub>                                      |
| <i>siaA</i> <sub>386</sub> -xho-R  | CCCctc gagCTAGTTCGAATCGGAAGGACAGG  | For constructing pGEX- <i>siaA</i> <sub>386</sub>                                       |
| <i>siaC</i> -bam-F                 | TTAg gatccGGCGGAGGAATGAGTGACCTGCAC | For constructing pET- <i>siaC</i> , pSumo- <i>siaC</i> and pGEX- <i>siaC</i>            |
| <i>siaC</i> -eco-R                 | CCCgaattcCTACTCGTCTGGGCC           | For constructing pET- <i>siaC</i> , pSumo- <i>siaC</i> and pGEX- <i>siaC</i>            |
| <i>siaB</i> -bam-F                 | ATAg gatccATGGAAACGCTAGACCTGCTGG   | For constructing pSumo- <i>siaB</i> and pGEX- <i>siaB</i>                               |
| <i>siaB</i> -eco-R                 | CTAgaattcTCAGATCACGGCGCGCA         | For constructing pSumo- <i>siaB</i> and pGEX- <i>siaB</i>                               |
| <i>siaD</i> -bam-F                 | ATAg gatccGTGCGGCTGGAGCGCAT        | For constructing pSumo- <i>siaD</i> and pGEX- <i>siaD</i>                               |
| <i>siaD</i> -sal-R                 | CCCg tgcacGCGCGCTGGAGCC            | For constructing pSumo- <i>siaD</i> and pGEX- <i>siaD</i>                               |
| <i>siaB</i> -H1F                   | AGCgaattcTGGCTGCTGAAGGAAGACG       | For construction of pEX- <i>siaB</i> -H                                                 |
| <i>siaB</i> -H1R                   | TGCtctagaCAGCAGGTCTAGCGTTTCCAT     | For construction of pEX- <i>siaB</i> -H                                                 |
| <i>siaB</i> -H2F                   | TGCtctagaTACAAGGAGCAGCTACGCCG      | For construction of pEX- <i>siaB</i> -H                                                 |
| <i>siaB</i> -H2R                   | CCCaa gcttAGGGACAGGACATGGACTGC     | For construction of pEX- <i>siaB</i> -H                                                 |
| <i>siaC</i> -H1F                   | AGCgaattcGGCCGCCAGCAACTCTTC        | For construction of pEX- <i>siaC</i> -H                                                 |
| <i>siaC</i> -H1R                   | TGCtctagaCCGGGTATGTGCAGGTCACT      | For construction of pEX- <i>siaC</i> -H                                                 |
| <i>siaC</i> -H2F                   | TGCtctagaGAGGACTGCAGCTTCCCCTT      | For construction of pEX- <i>siaC</i> -H                                                 |
| <i>siaC</i> -H2R                   | CCCaa gcttACCCAGCACTACGCCGACT      | For construction of pEX- <i>siaC</i> -H                                                 |
| <i>siaD</i> -H1F                   | AGCgaattcCATCCTGCTCTGCTTCAACG      | For construction of pEX- <i>siaD</i> -H                                                 |
| <i>siaD</i> -H1R                   | TGCtctagaGGCGATGCGCTCCAGCCGCA      | For construction of pEX- <i>siaD</i> -H                                                 |
| <i>siaD</i> -H2F                   | TGCtctagaCGCGACAAATGCGTGTTTCG      | For construction of pEX- <i>siaD</i> -H                                                 |
| <i>siaD</i> -H2D                   | CCCaa gcttTCACGCCGATGGAAACCTG      | For construction of pEX- <i>siaD</i> -H                                                 |
| <i>siaA</i> -H1F                   | AGCgaattcGACCCGCTCAACGGCATC        | For construction of pEX- <i>siaA</i> -H                                                 |
| <i>siaA</i> -H1R                   | TGCtctagaGGCACAGGCCAGCAACAG        | For construction of pEX- <i>siaA</i> -H                                                 |
| <i>siaA</i> -H2F                   | TGCtctagaACTGACGGTTTCCCTCGACCAG    | For construction of pEX- <i>siaA</i> -H                                                 |
| <i>siaA</i> -H2R                   | CCCaa gcttCGATGCGGTGTTCCGGTAAC     | For construction of pEX- <i>siaA</i> -H                                                 |
| <i>siaB</i> -C-H1F-bam             | AGCg gatccCCTACATTCCCCAACTGCG      | For construction of pEX- <i>siaC</i> - <i>siaB</i> -H                                   |
| <i>siaB</i> -C-H1R-xba             | TGCtctagaCAGCAGGTCTAGCGTTTCCAT     | For construction of pEX- <i>siaC</i> - <i>siaB</i> -H                                   |
| <i>siaB</i> -C-H2F-xba             | TGCtctagaGACGAGTAGCCGACGATGAG      | For construction of pEX- <i>siaC</i> - <i>siaB</i> -H                                   |
| <i>siaB</i> -C-H2R-hind            | CCCaa gcttAGGGACAGGACATGGACTGC     | For construction of pEX- <i>siaC</i> - <i>siaB</i> -H                                   |

## Reference

- Becher A, Schweizer HP (2000) Integration-proficient *Pseudomonas aeruginosa* vectors for isolation of single-copy chromosomal lacZ and lux gene fusions. *Biotechniques* 29: 948-50, 952
- Hoang TT, Karkhoff-Schweizer RR, Kutchma AJ, Schweizer HP (1998) A broad-host-range Flp-FRT recombination system for site-specific excision of chromosomally-located DNA sequences: application for isolation of unmarked *Pseudomonas aeruginosa* mutants. *Gene* 212: 77-86
- West SE, Schweizer HP, Dall C, Sample AK, Runyen-Janecky LJ (1994) Construction of improved *Escherichia-Pseudomonas* shuttle vectors derived from pUC18/19 and sequence of the region required for their replication in *Pseudomonas aeruginosa*. *Gene* 148: 81-6
- Yang C, Wu R, Liu H, Chen Y, Gao Y, Chen X, Li Y, Ma J, Li J, Gan J (2018) Structural insights into DNA degradation by human mitochondrial nuclease MGME1. *Nucleic Acids Res* 46: 11075-11088
