# Supplementary material
Source: PubMed Central journal article supplement (PMC7073463)
Supplement: EMBJ-39-e103412-s002.pdf [file EMBJ-39-e103412-s002.pdf]

## Expanded View Figures

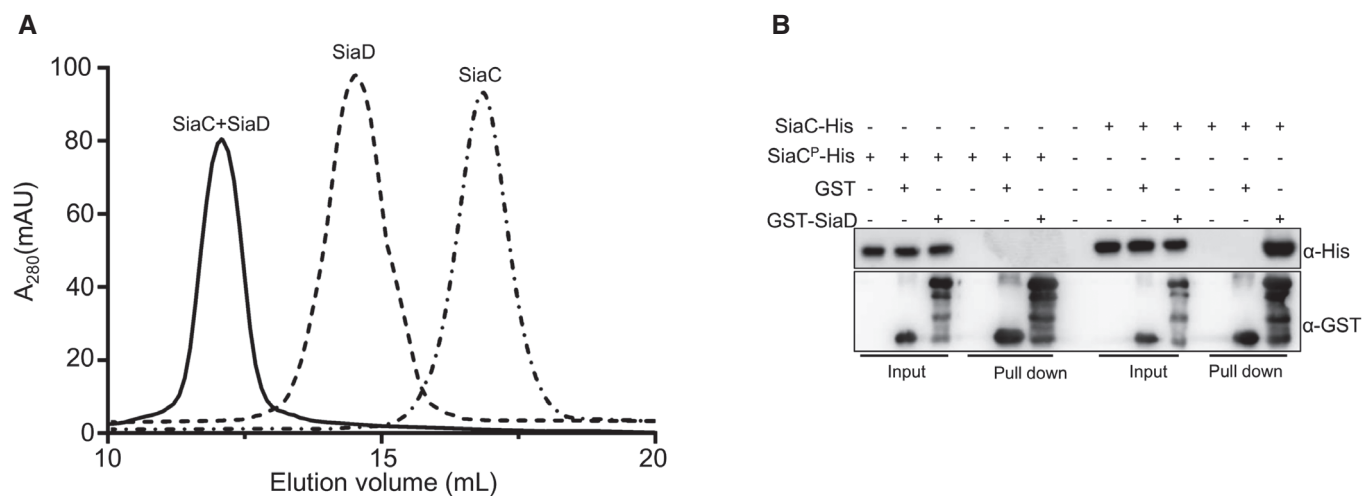

**Figure EV1. Interactions of SiaD with SiaC or SiaC<sup>P</sup>.**

A Size exclusion chromatography elution profile of the purified SiaC and SiaD on a superdex 200 10/300 column.

B GST pull-down assays showed that SiaD interacts with SiaC but not SiaC<sup>P</sup>. Purified SiaC or SiaC<sup>P</sup> was incubated with GST, GST-PA0170 individually, and protein complexes were captured by glutathione beads.

Source data are available online for this figure.

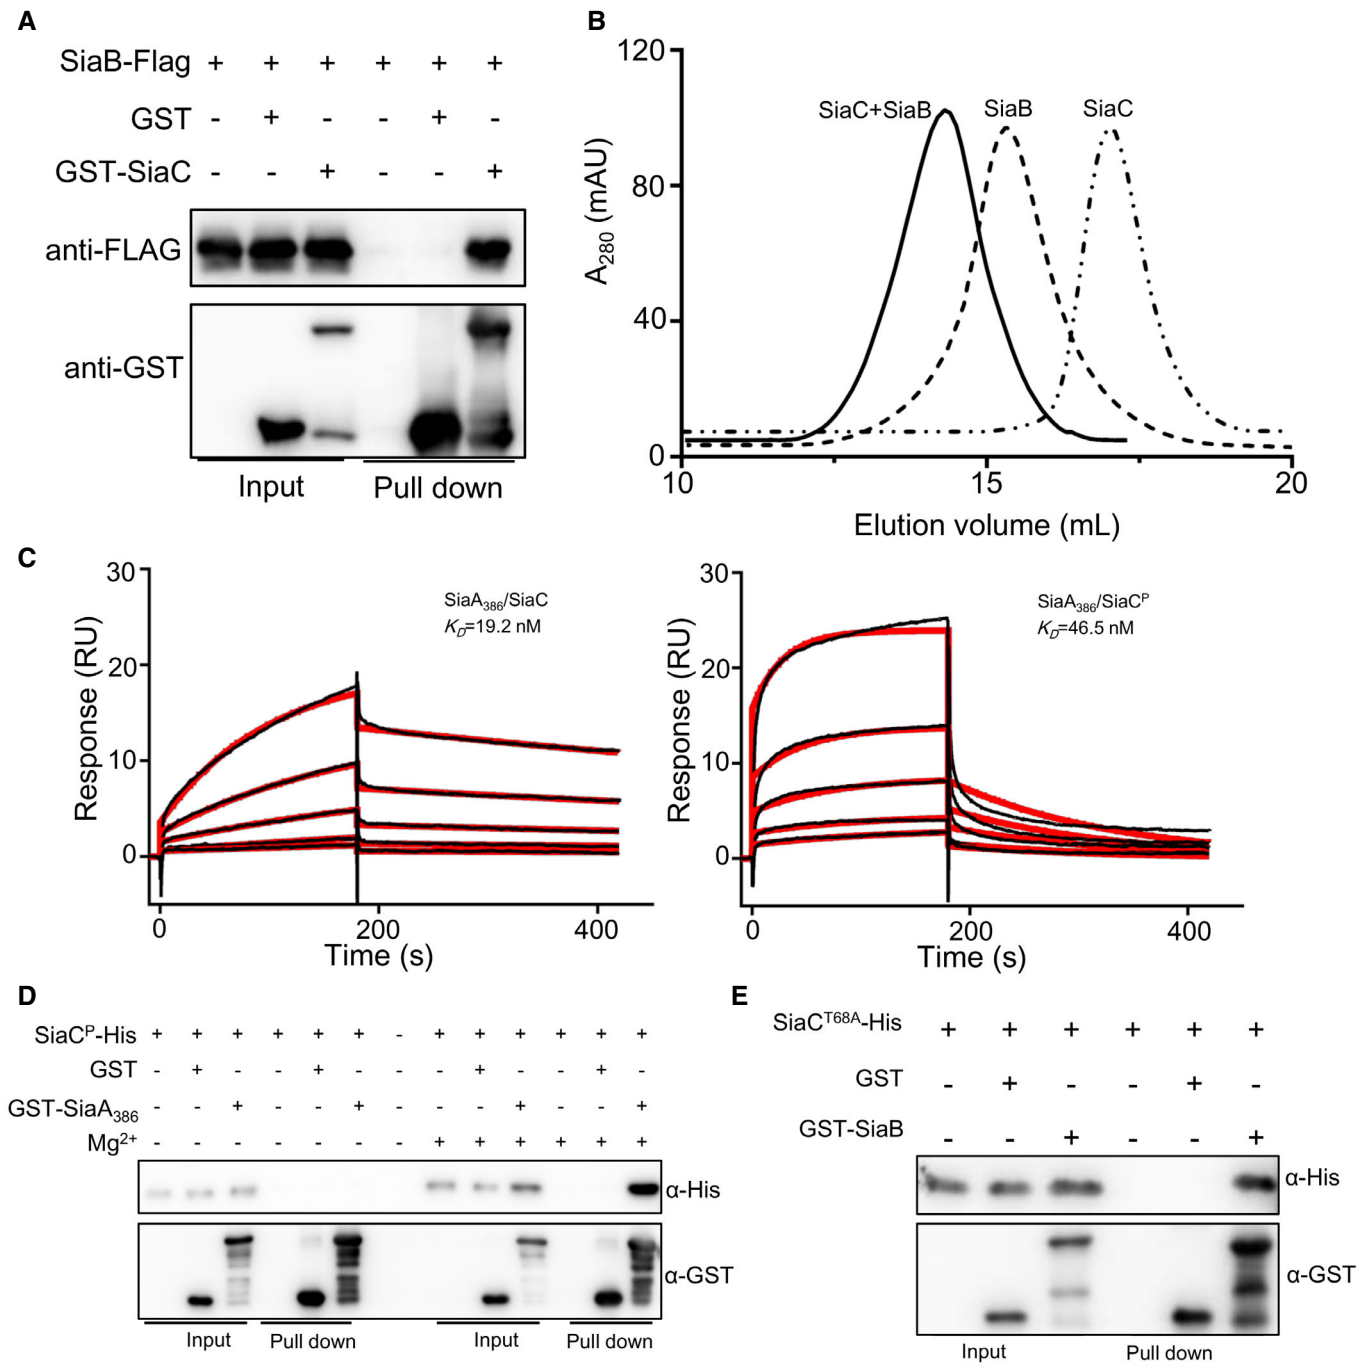

**Figure EV2. SiaC interacts with SiaA or SiaB.**

A GST pull-down shows direct interaction between SiaC and SiaB. Cell lysates of *Pseudomonas aeruginosa* containing pMM67EH-*siaB*-Flag were incubated with GST and GST-SiaC individually, and protein complexes were captured by glutathione beads.

B Size exclusion chromatography elution profile of the purified SiaB and SiaC on a superdex 200 10/300 column.

C SPR measurements of SiaC or SiaC<sup>P</sup> binding at varying concentrations to SiaA<sub>386</sub>. SiaC-His or SiaC<sup>P</sup>-His specifically interacted with SiaA<sub>386</sub> with a  $K_D$  of 19.2 or 46.5 nM. Shown are measured binding responses (black) and curve fits to a 1:1 interaction (red). Plots are representative of two experiments with similar results. RU, response units;  $K_D$ , dissociation constant.

D GST pull-down shows direct interaction between SiaC<sup>P</sup> and SiaA<sub>386</sub>. Purified SiaC<sup>P</sup> was incubated with GST and GST-SiaA<sub>386</sub> individually in buffers with or without 10 mM MgCl<sub>2</sub>, and protein complexes were captured by glutathione beads.

E GST pull-down shows direct interaction between SiaC<sup>T68A</sup> and SiaB. Purified SiaC<sup>T68A</sup>-His was incubated with GST, GST-SiaB individually, and protein complexes were captured by glutathione beads.

Source data are available online for this figure.

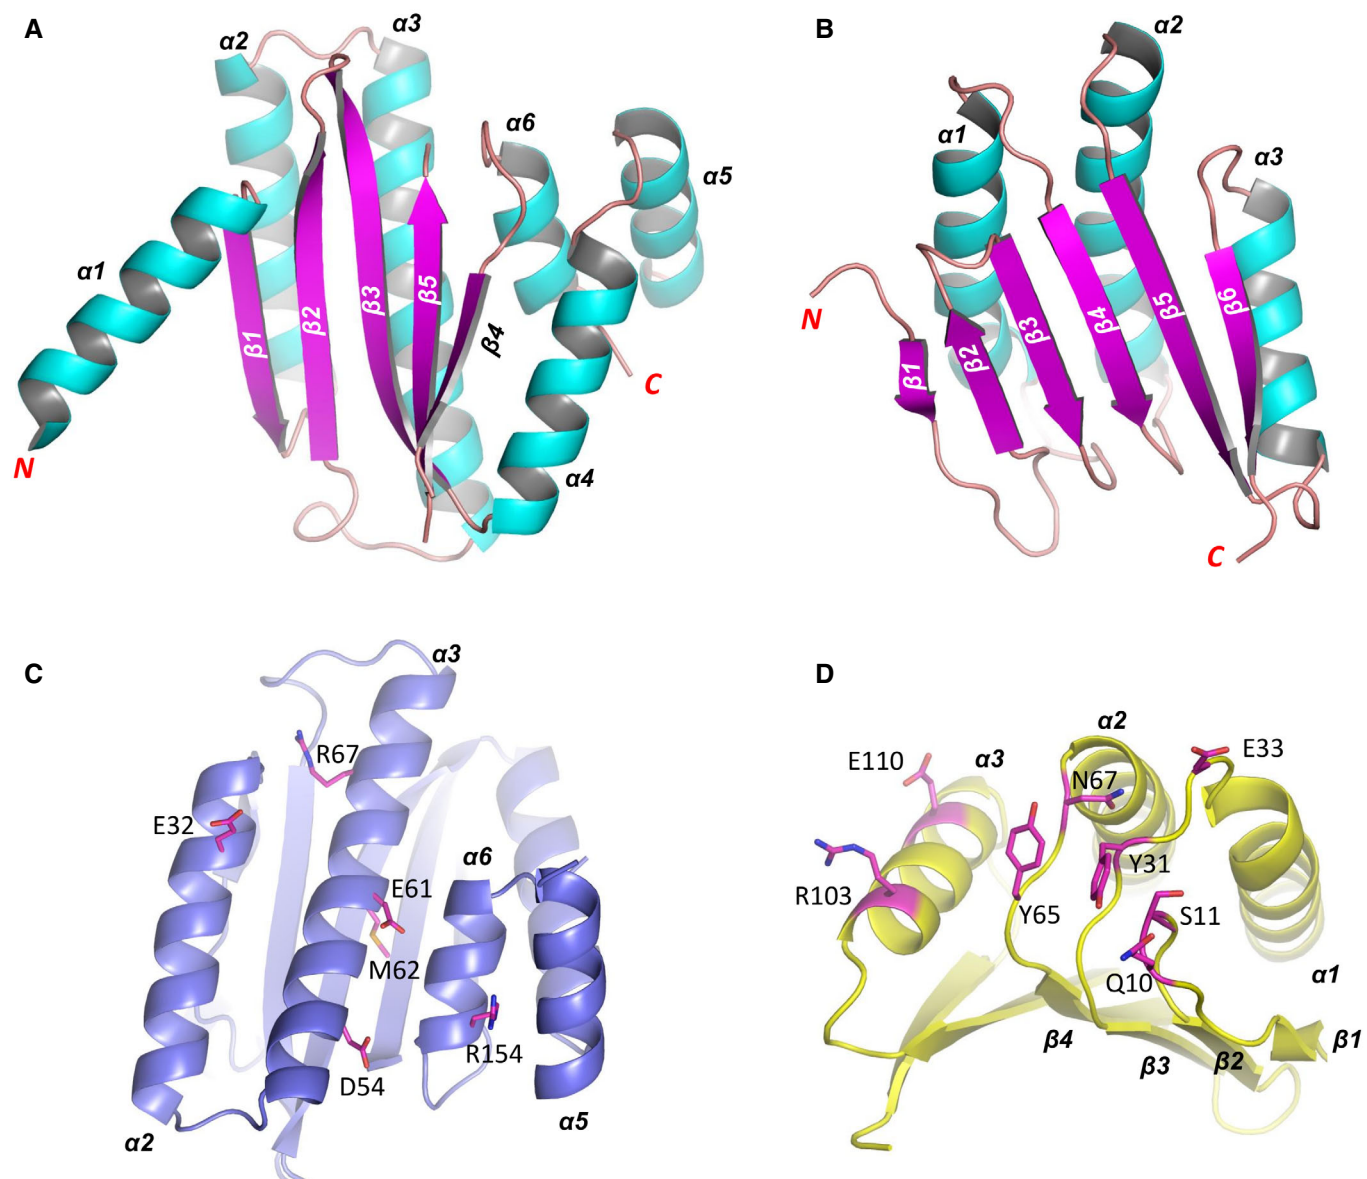

**Figure EV3. The structures of SiaB and SiaC.**

A, B The overall fold of SiaB and SiaC monomers.

C, D The relative orientations of residues involved in SiaB-SiaC interactions.

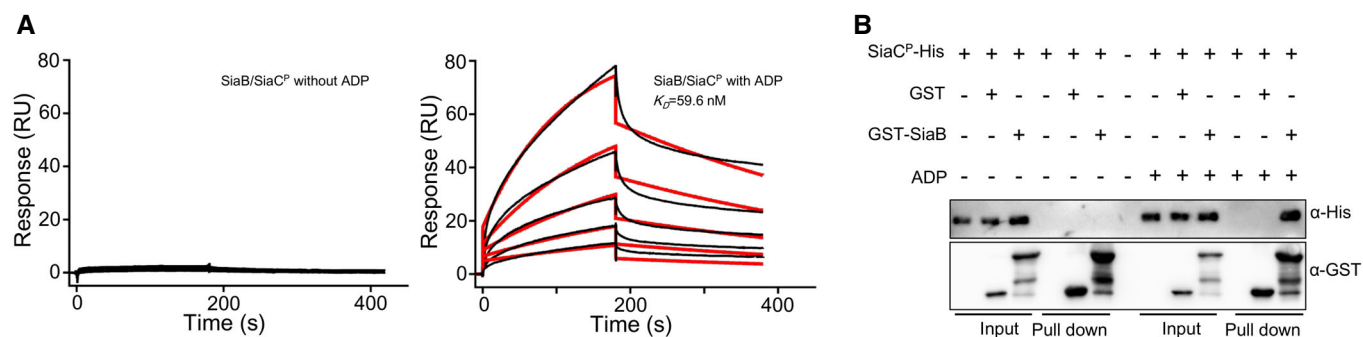

**Figure EV4. SiaB interacts with SiaC<sup>P</sup> in the presence of ADP.**

**A** SPR measurements of SiaC<sup>P</sup> binding at varying concentrations to SiaB with or without 2 mM ADP. SiaC<sup>P</sup>-His specifically interacted with SiaB with a  $K_D$  of 59.6 nM in the presence of ADP. Shown are measured binding responses (black) and curve fits to a 1:1 interaction (red). Plots are representative of two experiments with similar results. RU, response units;  $K_D$ , dissociation constant.

**B** GST pull-down shows direct interaction between SiaC<sup>P</sup> and SiaB in the presence of 2 mM ADP. Purified SiaC<sup>P</sup> was incubated with GST and GST-SiaB individually in buffers supplemented with or without 2 mM ADP, and protein complexes were captured by glutathione beads.

Source data are available online for this figure.

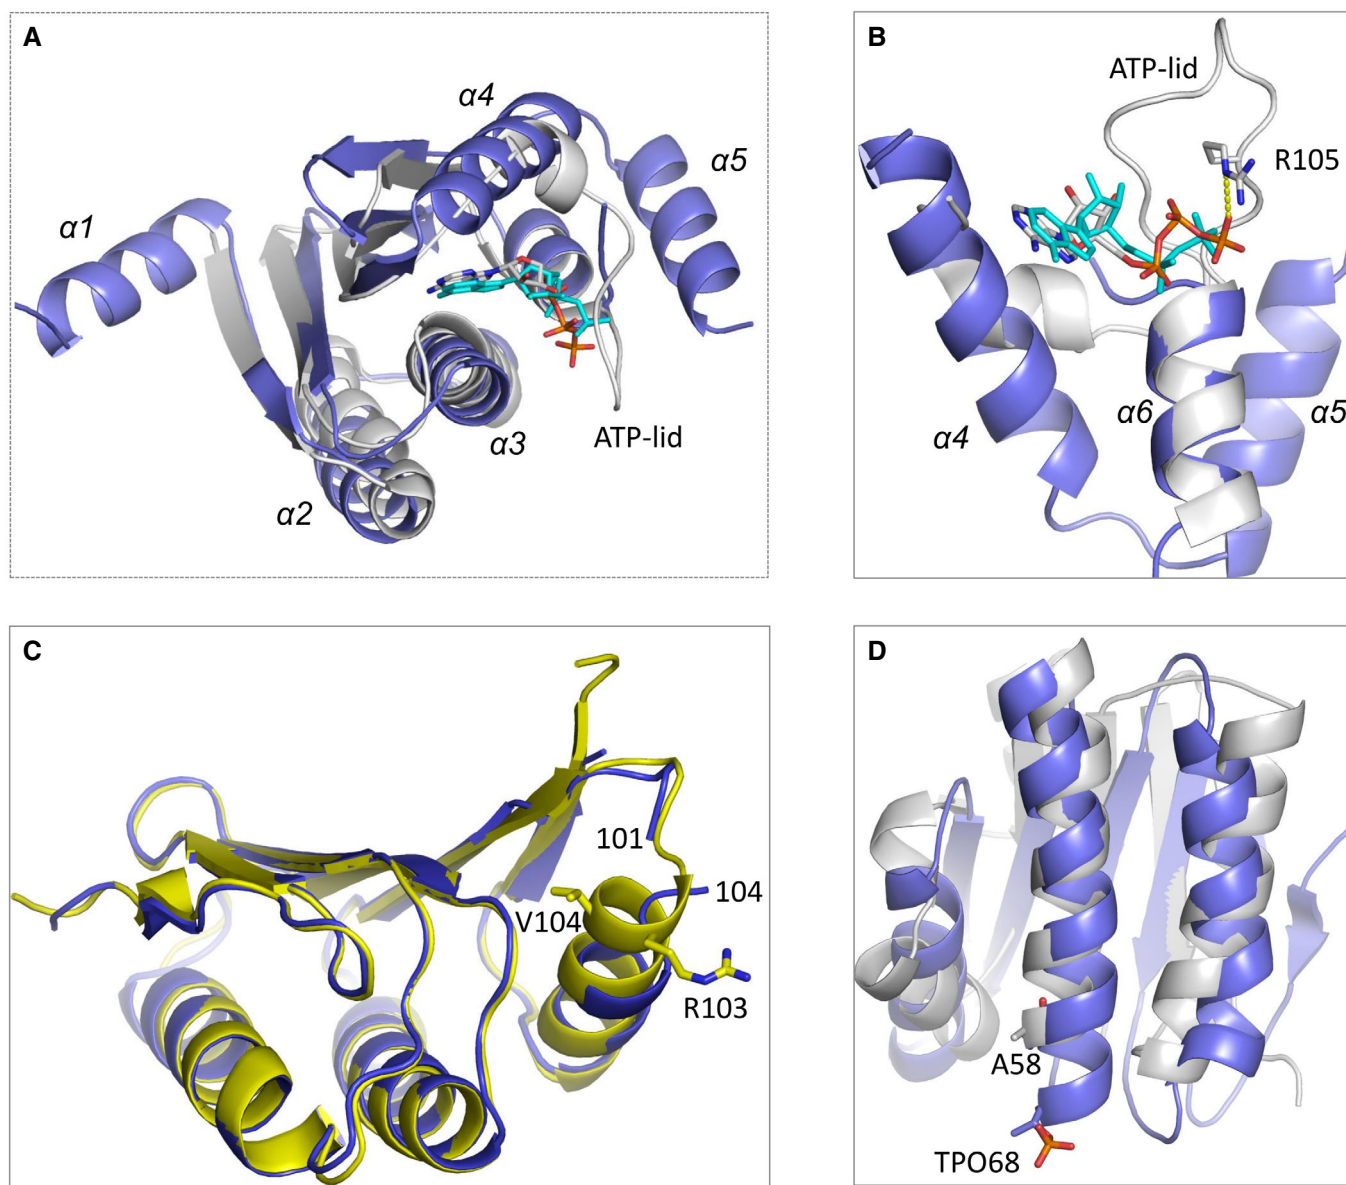

**Figure EV5. Structural analysis of SiaB and SiaC.**

- A, B Comparison of SiaB and *BsSpolIAB*. SiaB and *BsSpolIAB* are shown as cartoon in blue and white, respectively. ADP in the SiaB/SiaC complex is shown as stick in cyan. ATP in the *BsSpolIAB/BsSpolIAA* complex is shown as sticks in atomic color (C, white; N, blue; O, red; P, orange).
- C Superposition of SiaC in the complex and apo-structures, which are colored in yellow and blue, respectively.
- D Superposition of SiaC and *BsSpolIAA*, which are colored in blue and white, respectively.
